# Supplementary material for: Tight Regulation of Mechanotransducer Proteins Distinguishes the Response of Adult Multipotent Mesenchymal Cells on PBCE-Derivative Polymer Films with Different Hydrophilicity and Stiffness
Source: MDPI journal article supplement (doi:10.3390/cells12131746), 2023-06-29
Supplement: s1 [file s1]

The supplementary file includes Supplementary Figures S1-S8 with related captions:

**Figure S1:** Expression of FAs proteins in hBM-MSCs;

**Figure S2:** Expression of FAs proteins in hASCs;

**Figure S3:**  $\beta$ Catenin expression in hBM-MSCs and hASCs;

**Figure S4:** Representative bands of Actin-linking proteins;

**Figure S5:** Nuclear cyto-morphometric computational analysis of hBM-MSCs and hASCs;

**Figure S6:** Expression of Lamin A, Lamin C, and Lamin B in hBM-MSCs and hASCs;

**Figure S7:** Representative bands of mechanotransducer transcriptional factors;

**Figure S8:** Vimentin expression in hBM-MSCs and hASCs.

1

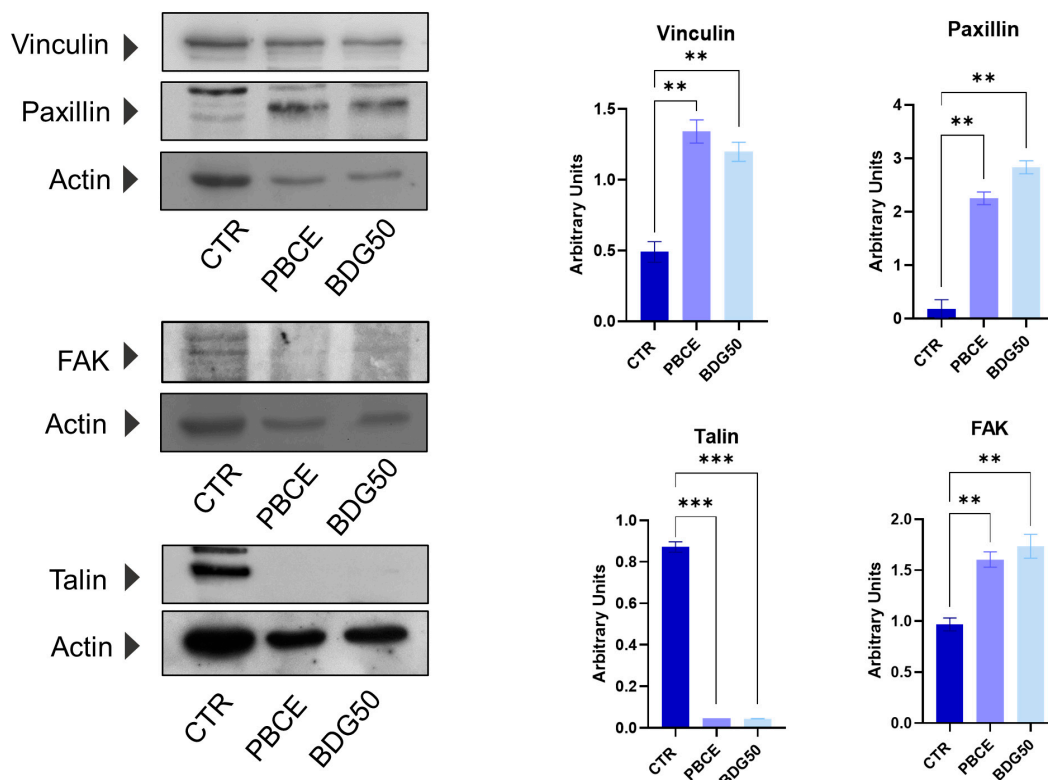

**Figure S1.** Expression of FAs proteins in hBM-MSCs on TCP (CTR), PBCE and BDG50 films at D7. Representative bands and relative densitometric analysis of 3 independent experiments of western blot showing protein expressions of Vinculin, Talin, Paxillin and FAK. Results were expressed as the mean  $\pm$  SD of three independent experiments, each in triplicates. \*\*p < 0.01, \*\*\*p < 0.001.

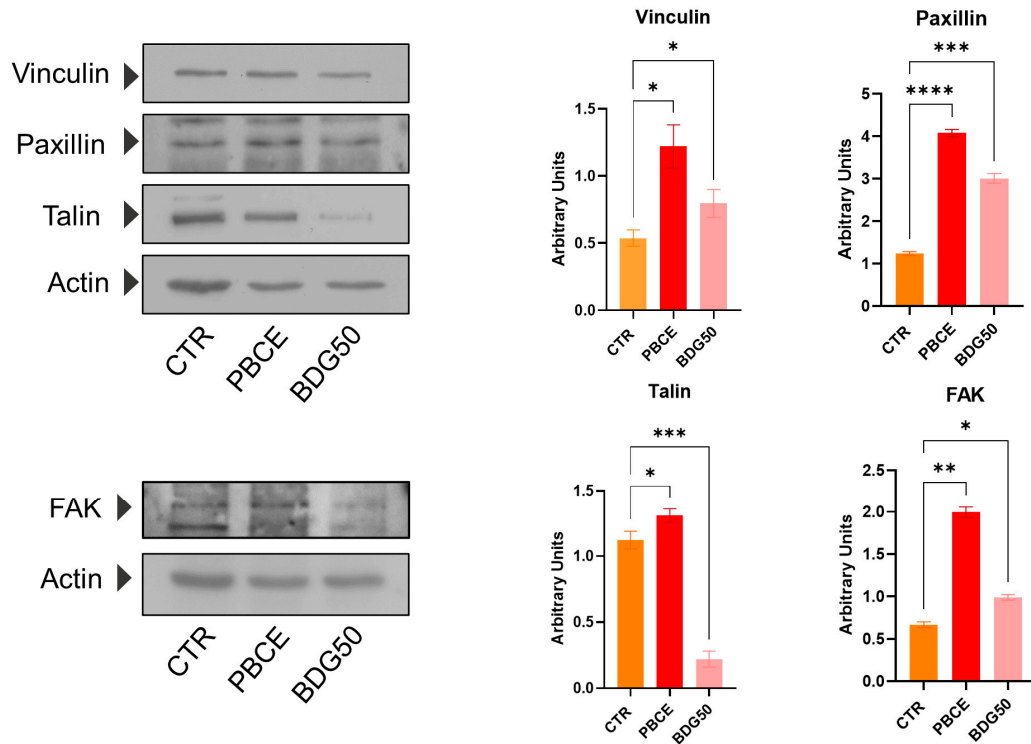

**Figure S2.** Expression of FAs proteins in hASCs on TCP (CTR), PBCE and BDG50 films at D7. Representative bands and relative densitometric analysis of 3 independent experiments of western blot showing protein expressions of Vinculin, Talin, Paxillin and FAK. Results were expressed as the mean  $\pm$  SD of three independent experiments, each in triplicates. \*p < 0.05, \*\*p < 0.01, \*\*\*p < 0.001, \*\*\*\*p < 0.0001.

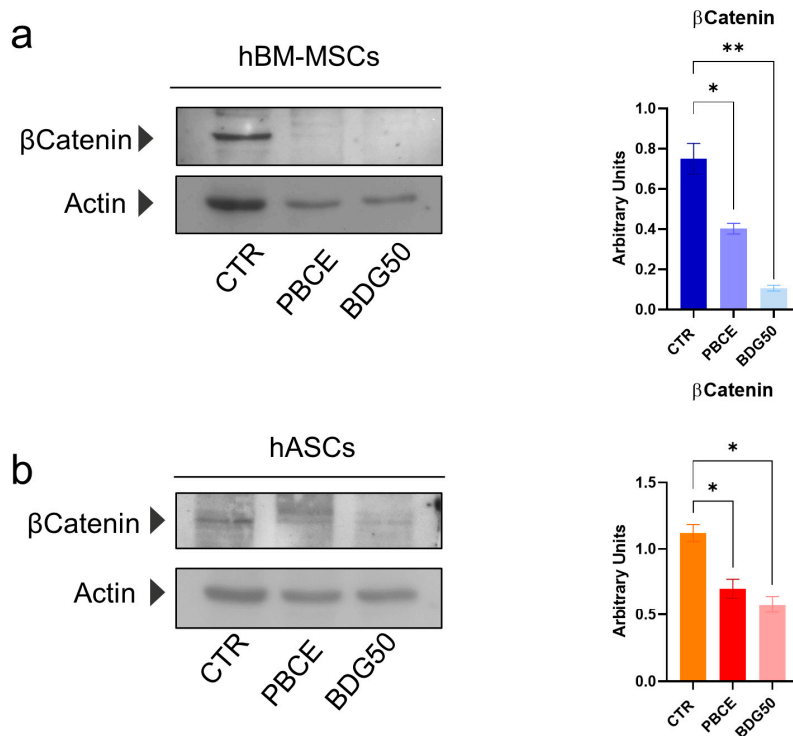

**Figure S3.** Expression of  $\beta$ Catenin in hBM-MSCs a) and hASCs b) on PBCE, BDG50 films and CTR at D7 and relative densitometric analysis. Results were expressed as the mean  $\pm$  SD of three independent experiments, each in triplicates. \*p < 0.05, \*\*p < 0.01.

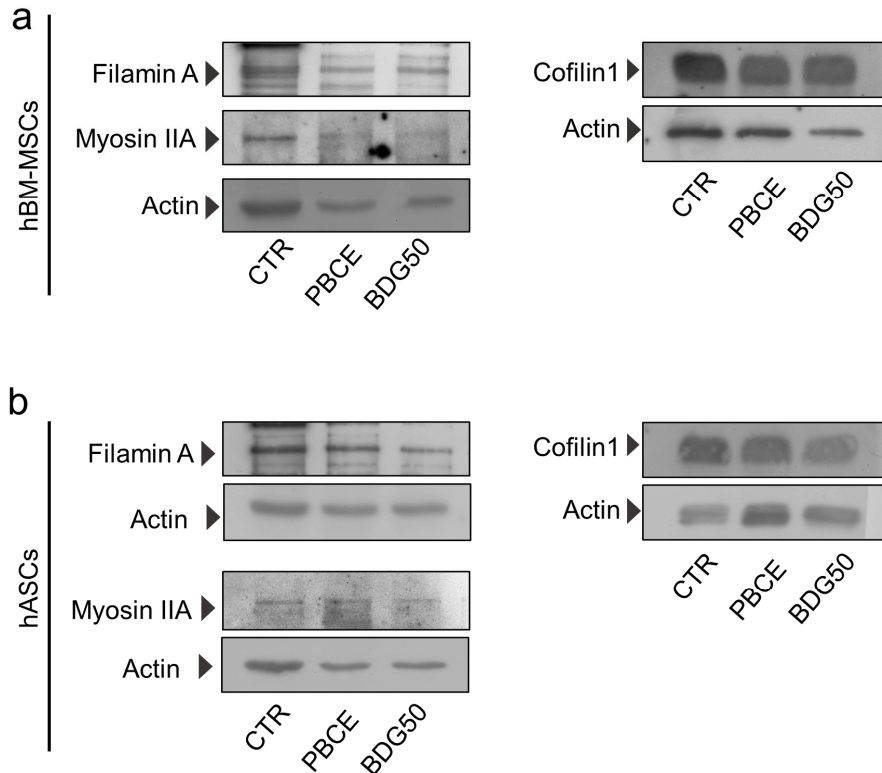

**Figure S4.** Representative bands of Actin-linking proteins in **a**) hBM-MSCs and **b**) hASCs on TCP (CTR), PBCE and BDG50 respectively at D7. Representative bands of 3 independent experiments of western blot showing protein expressions of Actin-linking proteins: Filamin A, Myosin IIA and Cofilin1.

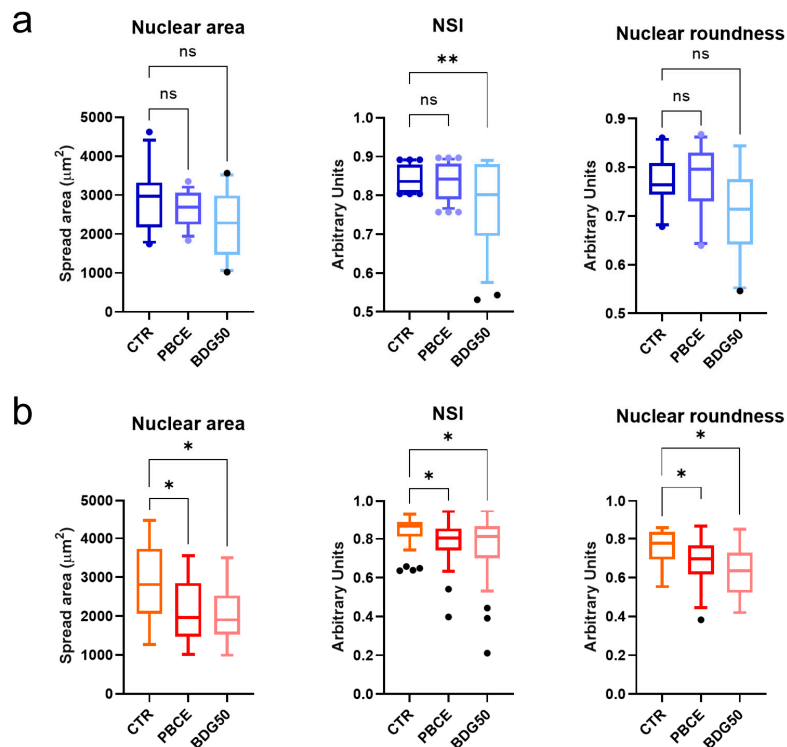

**Figure S5.** Nuclear area, Nuclear Shape Index (NSI) and Nuclear roundness of hBM-MSCs (a) and hASCs (b) on CTR, PBCE and BDG50 films. Data are represented as box and whiskers (min to max) with Kruskal-Wallis test and Dunn's multiple comparison test. \*  $p < 0.05$ , \*\*  $p < 0.01$ .

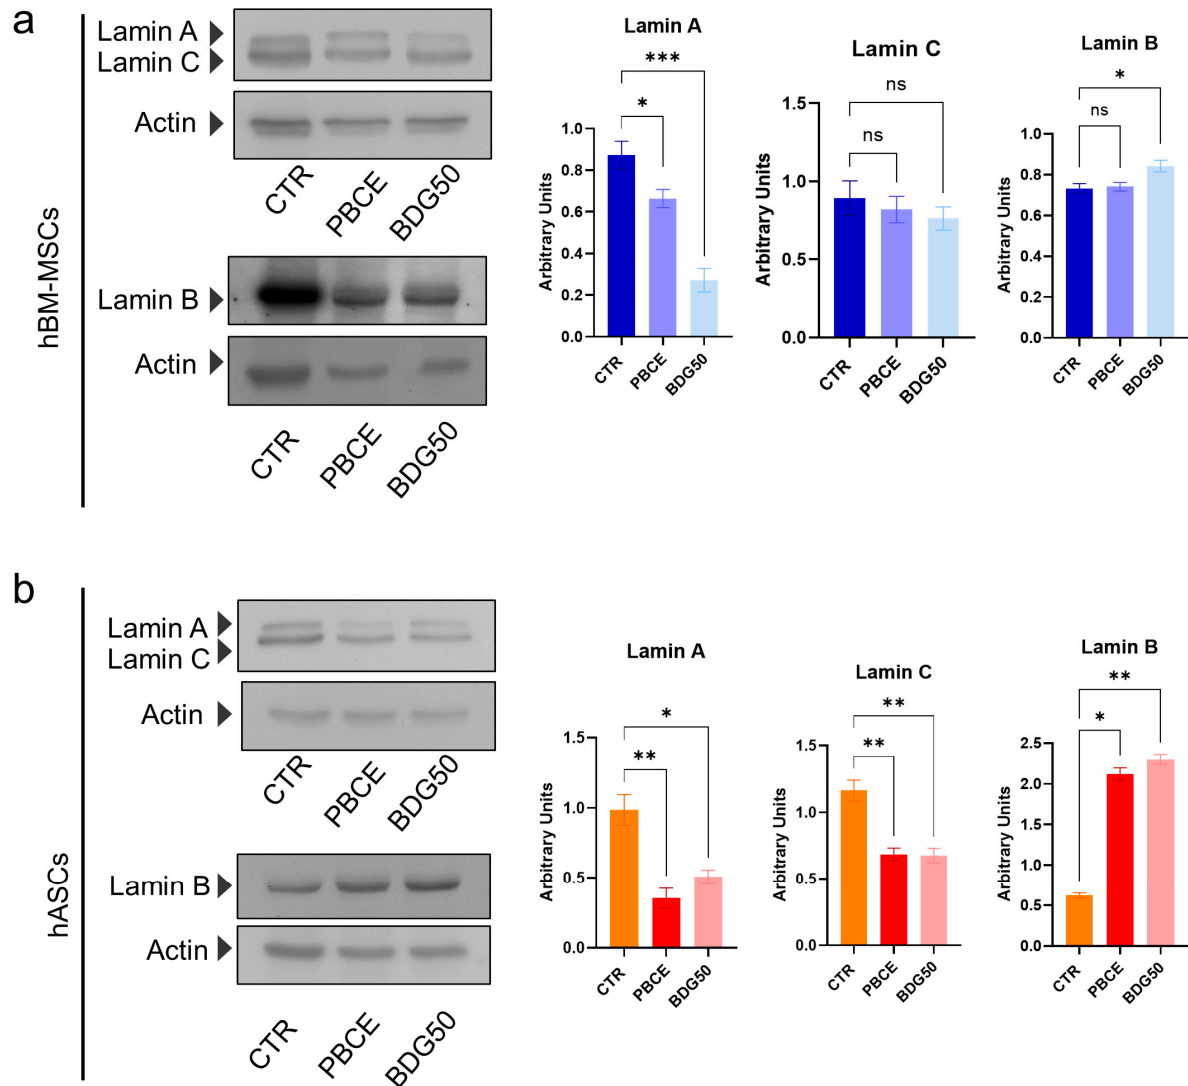

**Figure S6.** Expression of Lamin A, Lamin C and Lamin B in **a**) hBM-MSCs and **b**) hASCs on TCP (CTR), PBCE and BDG50 respectively at D7. Representative bands and relative densitometric analysis of 3 independent experiments of western blot showing protein expressions of Nucleoskeleton proteins: Lamin A, Lamin C and Lamin B. Results were expressed as the mean  $\pm$  SD of three independent experiments, each in triplicates. \* $p < 0.05$ , \*\* $p < 0.01$ , \*\*\* $p < 0.001$ .

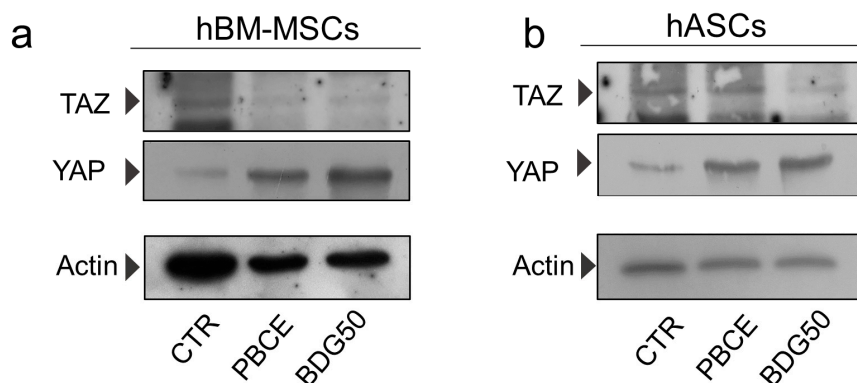

**Figure S7.** Representative bands of mechanotransducer transcriptional factors. Yap and TAZ **a**) in hBM-MSCs and **b**) hASCs on TCP (CTR), PBCE and BDG50 respectively at D7.

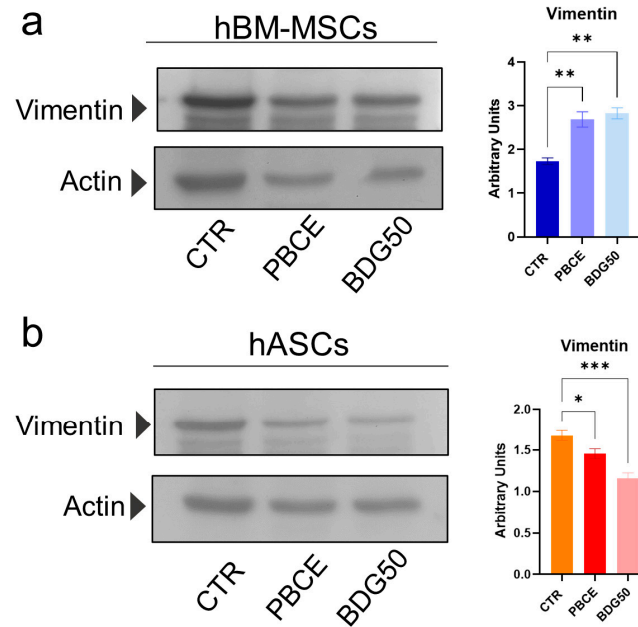

**Figure S8.** Vimentin expression in hBM-MSCs **a)** and hASCs **b)** on PBCE, BDG50 films and CTR at D7 and relative densitometric analysis. Results were expressed as mean  $\pm$  SD of three independent experiments, each in triplicates. \* $p < 0.05$ , \*\* $p < 0.01$ , \*\*\* $p < 0.001$ .

The Vimentin expression was increased in hBM-MSCs on both PBCE (55% higher than control) and BDG50 (63% higher than control) films, whereas was reduced in hASCs on both PBCE (13% less than the control) and BDG50 (30% less than the control) films.

These results support the involvement of IFs in the morphological changes in both multipotent cells.
